# Supplementary material for: High-pressure synthesis and crystal structure of non-centrosymmetric K2Ca3(CO3)4
Source: Royal Society of Chemistry journal article supplement (doi:10.1039/d1ce00882j), 2021-01-01
Supplement: d1ce00882j1.pdf [file d1ce00882j1.pdf]

**Supplementary Table S1.** Calculated powder XRD pattern for  $K_2Ca_3(CO_3)_4$  (reflections with  $I_{100} \geq 5$ ).

| <i>h</i> | <i>k</i> | <i>l</i> | <i>d</i> (Å) | <i>I</i> <sub>100</sub> |
|----------|----------|----------|--------------|-------------------------|
| 0        | 0        | 2        | 8.241        | 5                       |
| 1        | 0        | 1        | 6.744        | 6                       |
| 0        | 1        | 2        | 6.020        | 6                       |
| 1        | 1        | 0        | 5.664        | 7                       |
| 1        | 1        | 1        | 5.356        | 5                       |
| 1        | 2        | 0        | 3.786        | 11                      |
| 2        | 0        | 0        | 3.695        | 11                      |
| 2        | 0        | 2        | 3.372        | 9                       |
| 1        | 2        | 3        | 3.117        | 97                      |
| 0        | 1        | 5        | 3.088        | 14                      |
| 0        | 2        | 4        | 3.010        | 35                      |
| 2        | 1        | 3        | 2.896        | 100                     |
| 0        | 3        | 1        | 2.893        | 11                      |
| 1        | 1        | 5        | 2.849        | 26                      |
| 2        | 2        | 0        | 2.832        | 21                      |
| 1        | 2        | 4        | 2.788        | 33                      |
| 2        | 0        | 4        | 2.751        | 14                      |
| 0        | 0        | 6        | 2.747        | 34                      |
| 1        | 3        | 0        | 2.731        | 16                      |
| 1        | 3        | 1        | 2.694        | 47                      |
| 2        | 2        | 2        | 2.678        | 18                      |
| 2        | 1        | 4        | 2.626        | 37                      |
| 0        | 3        | 3        | 2.591        | 13                      |
| 2        | 2        | 3        | 2.517        | 5                       |
| 2        | 0        | 5        | 2.460        | 41                      |
| 3        | 1        | 0        | 2.373        | 92                      |
| 2        | 2        | 4        | 2.334        | 7                       |
| 2        | 3        | 0        | 2.300        | 8                       |
| 3        | 1        | 2        | 2.280        | 6                       |
| 2        | 0        | 6        | 2.205        | 6                       |
| 0        | 3        | 5        | 2.193        | 9                       |
| 3        | 1        | 3        | 2.178        | 5                       |
| 1        | 4        | 1        | 2.095        | 14                      |

|   |   |   |       |    |
|---|---|---|-------|----|
| 0 | 1 | 8 | 2.006 | 5  |
| 2 | 2 | 6 | 1.972 | 14 |
| 1 | 4 | 3 | 1.971 | 13 |
| 0 | 4 | 4 | 1.943 | 21 |
| 2 | 1 | 7 | 1.937 | 7  |
| 1 | 3 | 6 | 1.937 | 19 |
| 1 | 1 | 8 | 1.936 | 11 |
| 3 | 1 | 5 | 1.926 | 5  |
| 3 | 3 | 0 | 1.888 | 23 |
| 2 | 4 | 1 | 1.880 | 7  |
| 0 | 2 | 8 | 1.866 | 8  |
| 3 | 3 | 2 | 1.840 | 8  |
| 0 | 3 | 7 | 1.837 | 5  |
| 1 | 2 | 8 | 1.810 | 10 |
| 3 | 2 | 5 | 1.801 | 7  |
| 2 | 0 | 8 | 1.799 | 16 |
| 4 | 1 | 1 | 1.798 | 5  |
| 3 | 1 | 6 | 1.796 | 9  |
| 0 | 1 | 9 | 1.793 | 23 |
| 1 | 3 | 7 | 1.783 | 9  |
| 0 | 5 | 1 | 1.753 | 6  |
| 4 | 0 | 3 | 1.751 | 8  |
| 2 | 4 | 4 | 1.720 | 8  |
| 4 | 1 | 3 | 1.718 | 6  |
| 3 | 3 | 4 | 1.716 | 9  |
| 4 | 2 | 1 | 1.695 | 5  |
| 4 | 0 | 5 | 1.612 | 6  |
| 0 | 6 | 0 | 1.469 | 6  |
| 5 | 2 | 3 | 1.358 | 5  |
