# Supplementary material for: High-pressure synthesis and crystal structure of non-centrosymmetric K2Ca3(CO3)4
Source: Royal Society of Chemistry journal article supplement (doi:10.1039/d1ce00882j), 2021-01-01
Supplement: d1ce00882j2.pdf [file d1ce00882j2.pdf]

**Supplementary Table S2.** Bond lengths and angles for (CO<sub>3</sub>) groups in K<sub>2</sub>Ca<sub>3</sub>(CO<sub>3</sub>)<sub>4</sub>

*Bond angles (deg.)*

|     |    |     |          |
|-----|----|-----|----------|
| O3  | C1 | O10 | 122.6(4) |
| O3  | C1 | O12 | 120.9(4) |
| O10 | C1 | O12 | 116.5(4) |
|     |    |     |          |
| O2  | C2 | O7  | 119.9(3) |
| O2  | C2 | O8  | 119.9(4) |
| O7  | C2 | O8  | 120.2(4) |
|     |    |     |          |
| O1  | C3 | O5  | 121.2(4) |
| O1  | C3 | O6  | 121.5(4) |
| O5  | C3 | O6  | 117.3(3) |
|     |    |     |          |
| O4  | C4 | O9  | 120.7(4) |
| O4  | C4 | O11 | 122.2(4) |
| O9  | C4 | O11 | 117.1(4) |

*Bond lengths (Å)*

|    |            |                  |
|----|------------|------------------|
| C1 | O12        | 1.287(5)         |
| C1 | O3         | 1.260(6)         |
| C1 | O10        | 1.283(6)         |
|    | <i>av.</i> | <i>1.277(15)</i> |
| C2 | O2         | 1.285(6)         |
| C2 | O7         | 1.281(6)         |
| C2 | O8         | 1.288(5)         |
|    | <i>av.</i> | <i>1.285(4)</i>  |
| C3 | O1         | 1.281(4)         |
| C3 | O6         | 1.274(6)         |
| C3 | O5         | 1.282(6)         |
|    | <i>av.</i> | <i>1.279(4)</i>  |
| C4 | O4         | 1.266(5)         |
| C4 | O9         | 1.279(6)         |
| C4 | O11        | 1.294(5)         |
|    | <i>av.</i> | <i>1.280(14)</i> |
